# Supplementary material
Source: Research Square preprint supplement (doi:10.21203/rs.3.rs-9048125/v1)
Supplement: Supplementary file 1 [file 96988513279fc68742ca7eda.docx]

Doan Hoang Duc works as a Translator Lecturer at FPT University (Vietnam), currently he is doing his Doctoral course in Edgewood University, USA. His research interests include translation pedagogy, literary translation, reflective and collaborative learning, and the use of AI tools in English education. He teaches undergraduate translation and English General and ESP (English for special purposes) courses. His research recently focuses on the use of AI and the application of SAMR model in English teaching and learning. Contact: DoanHD@fe.edu.vn.
